# Supplementary material for: Pasture diversity and regenerative management shape ruminant gut microbiome dynamics
Source: Research Square preprint supplement (doi:10.21203/rs.3.rs-8429011/v1), 2026-01-08
Supplement: Supplementary file 1 [file 2fd48258d1683da4ed172a24.docx]

**Estimated marginal means of Shannon index in cattle and sheep.**

Table S3: Estimated marginal means (EMMeans) ± SE of Shannon index in cattle across treatments and sampling time points.

| **EMMeans ± SE** | | | |
| --- | --- | --- | --- |
| **Time Point** | **Std-Con** | **Div-Reg** | **Div-Con** |
| Aug 2022 | 2.02±0.065c | 1.82±0.065c | 2.01±0.084cde |
| Oct 2022 | 2.43±0.065a | 2.43±0.065a | 2.42±0.065a |
| Nov2022 | 2.42±0.065a | 2.20±0.065ab | 2.31±0.065abcd |
| Dec 2022 | 2.04±0.065bc | 2.09±0.065bc | 2.03±0.065cd |
| Feb 2023 | 2.31±0.065abc | 2.20±0.065ab | 2.26±0.065abcd |
| Apr 2023 | 2.40±0.084ab | 2.35±0.084ab | 2.38±0.084abc |
| Aug 2023 | 1.63±0.084d | 2.33±0.084ab | 1.65±0.084e |
| Oct 2023 | 2.03±0.065bc | 2.13±0.065abc | 2.06±0.065bcd |
| Nov 2023 | 2.11±0.065abc | 2.22±0.065ab | 2.33±0.065abc |
| Dec 2023 | 2.16±0.069abc | 2.13±0.069abc | 2.29±0.069abcd |
| Feb 2024 | 2.12±0.069abc | 2.17±0.069ab | 2.12±0.069abcd |
| Apr 2024 | 2.28±0.065abc | 2.05±0.065bc | 1.99±0.065de |
| Aug 2024 | 2.20±0.069abc | 2.10±0.069abc | 2.20±0.069abcd |
| Oct 2024 | 2.33±0.069abc | 2.27±0.069ab | 2.29±0.069abcd |
| Nov 2024 | 2.29±0.065abc | 2.33±0.065ab | 2.36±0.065ab |
| Dec 2024 | 2.36±0.069ab | 2.14±0.069abc | 2.17±0.069abcd |
| Feb 2025 | 2.13±0.065abc | 2.22±0.065ab | 2.20±0.065abcd |
| Apr 2025 | 2.14±0.069abc | 2.13±0.069abc | 2.18±0.069abcd |

Different letters indicate significant differences among time points within the same treatment (*p* < 0.05).

Table S4: Estimated marginal means (EMMeans) ± SE of Shannon index in sheep across treatments and sampling time points.

| **EMMeans ± SE** | | | | |
| --- | --- | --- | --- | --- |
| **Time Point** | **Std-Con** | **Std-Reg** | **Div-Con** | **Div-Reg** |
| Mar 2023 | 2.38±0.068a | 2.24±0.068b | 2.34±0.068a | 2.19±0.068b |
| Jun 2023 | 2.33±0.068a | 2.27±0.068ab | 2.44±0.068a | 2.35±0.068ab |
| Aug 2023 | 2.31±0.068a | 2.36±0.068ab | 2.31±0.068a | 2.19±0.068ab |
| Oct 2023 | 2.42±0.068a | 2.45±0.068ab | 2.41±0.068a | 2.37±0.068ab |
| Nov 2023 | 2.54±0.077a | 2.59±0.076a | 2.43±0.076a | 2.52±0.077a |
| Mar 2024 | 2.44±0.068a | 2.49±0.068ab | 2.45±0.068a | 2.34±0.068ab |
| June 2024 | 2.27±0.068a | 2.36±0.068ab | 2.36±0.068a | 2.38±0.068ab |
| Aug 2024 | 2.57±0.068a | 2.36±0.068ab | 2.50±0.068a | 2.37±0.068ab |
| Oct 2024 | 2.41±0.077a | 2.37±0.077ab | 2.47±0.076a | 2.42±0.077ab |

Different letters indicate significant differences among time points within the same treatment (*p* < 0.05).
