# Supplementary material for: Pasture diversity and regenerative management shape ruminant gut microbiome dynamics
Source: Research Square preprint supplement (doi:10.21203/rs.3.rs-8429011/v1), 2026-01-08
Supplement: Supplementary file 2 [file 756a9de445e39879d9363f52.docx]

**Estimated marginal means of *Faecalibacterium prausnitzii* and *Bacteroides uniformis* relative abundances in cattle and sheep.**

Table S1: Estimated marginal means (EMMeans, %) ± SE of Faecalibacterium prausnitzii and Bacteroides uniformis relative abundances in cattle across treatments and sampling time points.

| **Time Point** | ***Faecalibacterium prausnitzii*** | | | ***Bacteroides uniformis*** | | |
| --- | --- | --- | --- | --- | --- | --- |
| **Std-Con** | **Div-Reg** | **Div-Con** | **Std-Con** | **Div-Reg** | **Div-Con** |
| Aug 2022 | 32.1±2.8ab | 41.0±2.86a | 38.8±2.86ab | 20.4±1.35bc | 21.2±1.35ab | 19.7±1.35ab |
| Oct 2022 | 27.1±2.86ab | 28.6±2.86abcde | 30.6±2.86abc | 25.7±1.35b | 25.2±1.35a | 23.2±1.35ab |
| Nov2022 | 29.1±2.86ab | 35.9±2.86abc | 32.5±2.86abc | 24.7±1.35b | 22.9±1.35a | 23.7±1.35ab |
| Dec 2022 | 27.2±2.86ab | 23.9±2.86cde | 27.4±2.86abc | 20.1±1.35bc | 19.9±1.35ab | 21.6±1.35ab |
| Feb 2023 | 19.8±2.86b | 21.6±2.86de | 23.8±2.86c | 19.9±1.35bc | 23.4±1.35a | 21.0±1.35ab |
| Apr 2023 | 26.7±3.68ab | 19.8±3.68cde | 28.6±3.68abc | 13.5±1.74c | 14.2±1.74b | 18.2±1.74b |
| Aug 2023 | - | 17.8±3.68e | 43.0±3.68a | 35.5±1.74a | 24.5±1.74a | 23.6±1.74ab |
| Oct 2023 | 35.2±2.86a | 28.7±2.86abcde | 28.2±2.86abc | 23.9±1.35b | 24.7±1.35a | 25.6±1.35ab |
| Nov 2023 | 20.0 ± 2.86b | 25.1±2.86bcde | 26.0±2.86bc | 24.5±1.35b | 25.7±1.35a | 26.1±1.35a |
| Dec 2023 | 21.7± 3.02ab | 21.9±3.02cde | 23.2±3.02c | 21.3±1.42bc | 21.4±1.42ab | 21.0±1.42ab |
| Feb 2024 | 35.1±3.02a | 19.4±3.02e | 27.8±3.02abc | 23.8±1.42b | 21.7±1.42ab | 23.0±1.42ab |
| Apr 2024 | 23.2±2.86ab | 38.7±2.86ab | 37.9±2.86ab | 21.9±1.35b | 21.7±1.35ab | 22.4±1.35ab |
| Aug 2024 | 22.0±3.02ab | 36.2±3.02abc | 35.8±3.02abc | 25.9±1.42b | 22.7±1.42a | 23.4±1.42ab |
| Oct 2024 | 30.0±3.02ab | 34.6±3.02abcd | 34.6±3.02abc | 21.8±1.42b | 21.7±1.42ab | 22.0±1.42ab |
| Nov 2024 | 27.7±2.86ab | 29.4±2.86abcde | 27.6±2.86abc | 22.2±1.35b | 22.4±1.35a | 22.4±1.35ab |
| Dec 2024 | 23.9±3.02ab | 26.5±3.02bcde | 28.3±3.02abc | 21.8±1.42b | 22.3±1.42a | 22.3±1.42ab |
| Feb 2025 | 24.9±2.86ab | 29.4±2.86abcde | 34.2±2.86abc | 21.4±1.35b | 22.5±1.35a | 21.3±1.35ab |
| Apr 2025 | 36.2±3.02a | 36.2±3.02abc | 32.2±3.02abc | 20.3±1.42bc | 20.8±1.42ab | 22.2±1.42ab |

Missing values (–) indicate species below the reporting threshold, defined as either less than 50% of the highest observed mean relative abundance or below the Bracken read count threshold. Different letters indicate significant differences among timepoints within the same treatment (*p < 0.05*).

Table S2: Estimated marginal means (EMMeans %) ± SE of *Faecalibacterium prausnitzii* relative abundances in sheep across treatments and sampling time points.

| **Time Point** | **Std-Con** | **Std-Reg** | **Div-Con** | **Div-Reg** |
| --- | --- | --- | --- | --- |
| Mar 2023 | 24.9±2.66a | 21.3±2.66a | 27.1±2.05a | 27.3±2.06ab |
| Jun 2023 | 19.9±2.06ab | 29.4±2.06a | 24.3±2.06a | 24.6±2.06ab |
| Aug 2023 | 25.3±2.06a | 27.3±2.06a | 26.1±2.06a | 29.5±2.06a |
| Oct 2023 | 28.4±2.06a | 22.9±2.06a | 26.0±2.06a | 24.7±2.06ab |
| Nov 2023 | 26.0±2.30a | 20.0±2.30a | 24.8±2.30a | 18.1±2.31b |
| Mar 2024 | 22.5±2.06ab | 24.5±2.06a | 22.9±2.06a | 29.5±2.06a |
| June 2024 | 26.8±2.07a | 25.5±2.06a | 28.9±2.06a | 27.1±2.06ab |
| Aug 2024 | 28.3±2.06a | 27.4±2.06a | 26.9±2.06a | 25.0±2.06ab |
| Oct 2024 | 22.4±2.31ab | 29.8±2.06a | 27.2±2.30a | 25.4±2.31ab |
| Nov 2024 | 13.2±2.66b | 22.1±2.66a | 27.2±2.66a | 29.4±2.66b |

Different letters indicate significant differences among timepoints within the same treatment (*p < 0.05*).
